# Supplementary material for: Friction reduction through biologically inspired scale-like laser surface textures
Source: publisher site journal article supplement (doi:10.3762/bjnano.9.238), 2018-09-26
Supplement: Additional file 1 [file 2190-4286-9-238-S1.pdf]

# Supporting Information

## for

### Friction reduction through biologically inspired scale-like laser surface textures

Johannes Schneider<sup>1,2</sup>, Vergil Djamiykov<sup>1,2</sup> and Christian Greiner<sup>\*1,2</sup>

Address: <sup>1</sup>Institute for Applied Materials (IAM), Karlsruhe Institute of Technology (KIT), Kaiserstrasse 12, 76131 Karlsruhe, Germany and <sup>2</sup>KIT IAM-CMS MikroTribologie Centrum  $\mu$ TC, Strasse am Forum 5, 76131 Karlsruhe, Germany

Email: Christian Greiner - greiner@kit.edu

\* Corresponding author

### Additional Figures

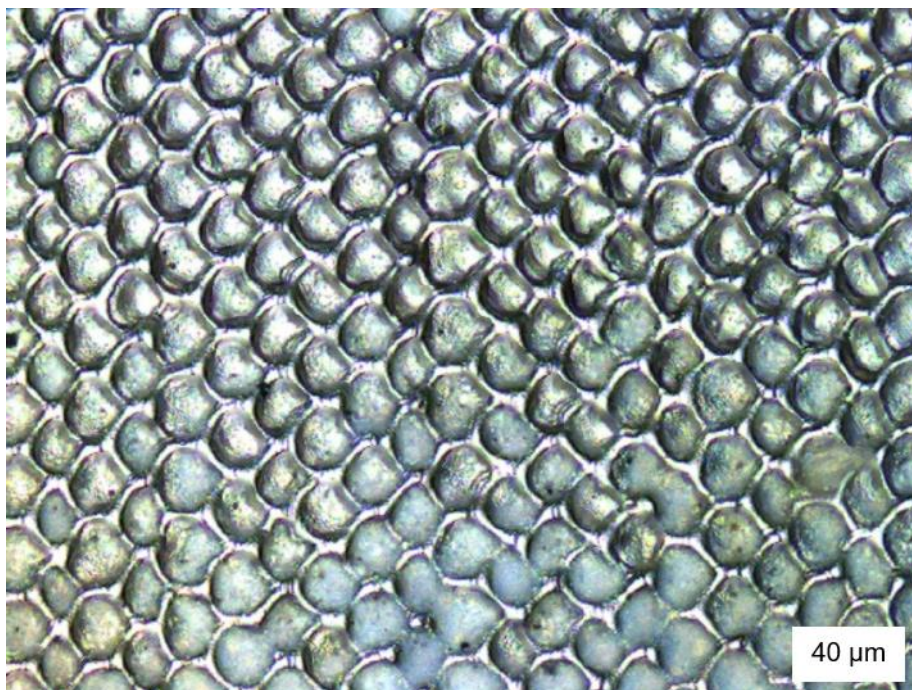

**Figure S1:** Optical micrograph of a scale-like surface texture after 1000 m of dry sliding against sapphire.

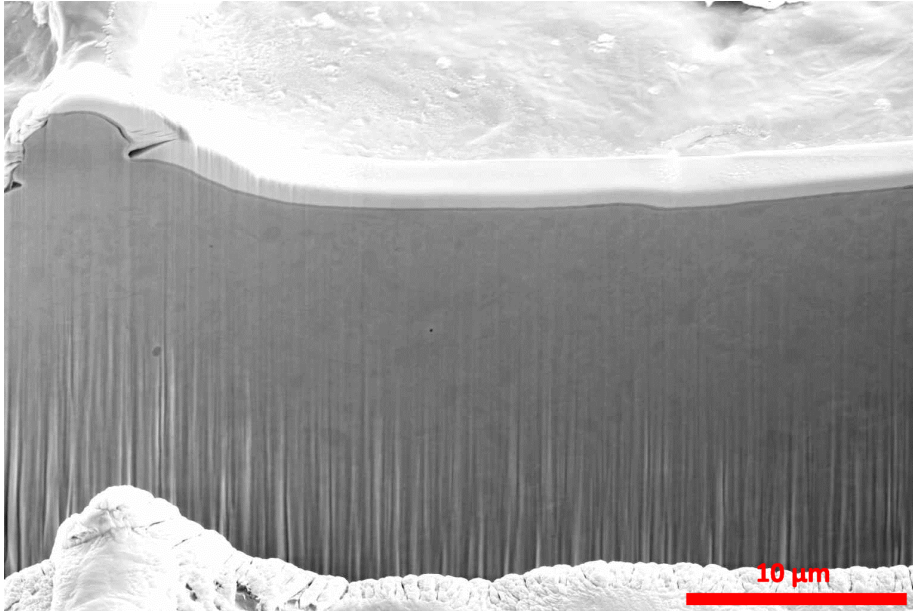

**Figure S2:** Scanning electron microscopy image of a focused ion beam cross-section of a laser textured sample.

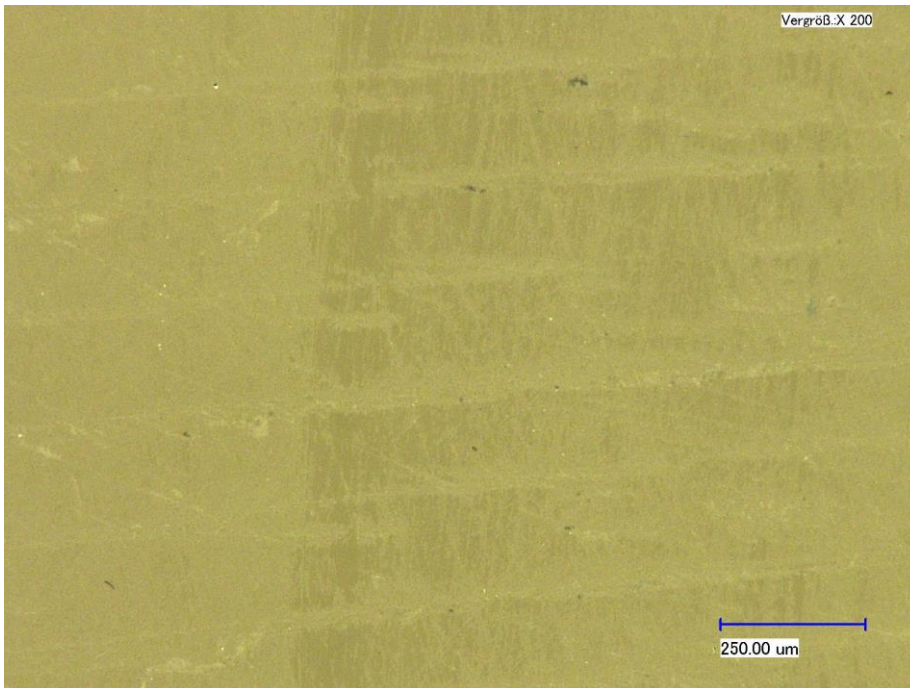

**Figure S3:** Optical micrograph of a PEEK disc after a dry sliding experiment.
